# Supplementary material for: The core autophagy machinery is not required for chloroplast singlet oxygen-mediated cell death in the Arabidopsis thaliana plastid ferrochelatase two mutant
Source: BMC Plant Biol. 2021 Jul 19;21:342. doi: 10.1186/s12870-021-03119-x (PMC8290626; doi:10.1186/s12870-021-03119-x)
Supplement: Supplementary file 2 — Additional file 2: Table S1.List of autophagy-related genes and expression data used in heatmap generation.Table S2. List of predicted microautophagy-related genes and expressiondata used in heatmap generation. Table S3. Mutants used in this study. TableS4. Primers use in this study. [file 12870_2021_3119_MOESM2_ESM.xlsx]

## Sheet: Table S1
Table S1. List of autophagy-related genes and expression data used in heatmap geneartion
Differential gene expression analysis of autophagy and autophagy-related genes used in heatmap (Fig 1a).
Previously published (Woodson et al., 2015) microarray data from 4 day old seedlings prior to and during de-etiolation.
All values reflect differential expression of fc2 relative to wt within the same timepoint.
GeneID	Gene	t0_logFC	t0_FDR	t30_logFC	t30_FDR	t120_logFC	t120_FDR
AT1G04140	N/A	0.12827	0.9999	0.00266733	0.999999	-0.184672	0.202001
AT1G04300	MUSE13	-0.0424818	0.9999	-0.0403073	0.999999	0.210134	0.549044
AT1G22740	RAB7	0.127698	0.9999	0.0695032	0.999999	0.57299	0.00010858
AT1G50030	TOR	0.0527202	0.9999	0.0141237	0.999999	0.122157	0.757294
AT1G54210	ATG12A	-0.043074	0.9999	0.185808	0.950561	0.172601	0.666872
AT1G60490	VPS34	0.0526904	0.9999	-0.028392	0.999999	0.0898103	0.77005
AT1G73190	TIP3	-1.42798	0.9999	-1.83474	0.472969	-0.184056	0.999982
AT1G77890	ATG14A	0.0667469	0.9999	-0.00716241	0.999999	0.261871	0.342317
AT2G31260	ATG9	0.188256	0.9999	0.528451	0.324773	0.227908	0.569136
AT2G38470	WRKY33	-0.103042	0.9999	0.0893282	0.999999	1.05261	0.0433851
AT2G39780	RNS2	0.0122972	0.9999	-0.112144	0.914307	-0.165953	0.309955
AT2G40810	ATG18C	-0.0573623	0.9999	0.121752	0.999999	0.0612599	0.999982
AT2G41980	SINAT1	0.112738	0.9999	0.361673	0.774294	-0.159709	0.933773
AT2G44140	ATG4A	NA	NA	NA	NA	NA	NA
AT2G45170	ATG8E	-0.292874	0.9999	-0.0812034	0.999999	0.478222	0.00207876
AT2G45260	COST1	-0.177398	0.9999	-0.222028	0.511211	0.00825408	0.999982
AT2G45980	ATI1	-0.0773	0.9999	-0.223407	0.40211	0.280945	0.0497678
AT2G46240	BAG6	0.033324	0.9999	1.17637	0.247413	3.52791	1.76722e-06
AT3G01090	KIN10	-0.112033	0.9999	0.0268281	0.999999	0.129117	0.482976
AT3G06420	ATG8H	-0.209475	0.9999	-0.138865	0.999999	0.464336	0.018188
AT3G07525	ATG10	NA	NA	NA	NA	NA	NA
AT3G08850	RAPTOR1B	0.0217188	0.9999	0.116054	0.999999	0.0748207	0.970692
AT3G09840	CDC48A	-0.0671731	0.9999	-0.170513	0.470789	-0.034561	0.999982
AT3G12010	N/A	0.0933647	0.9999	0.178946	0.664274	-0.106048	0.727847
AT3G13672	SINAT6	-0.284779	0.9999	0.200754	0.999999	-0.0748979	0.999982
AT3G13970	ATG12B	NA	NA	NA	NA	NA	NA
AT3G15580	ATG8I	-0.197292	0.9999	-0.0902073	0.960264	0.439293	0.000469318
AT3G18770	ATG13B	-0.0770391	0.9999	-0.177061	0.999999	-0.189353	0.890857
AT3G19190	ATG2	0.187708	0.9999	0.116705	0.999999	0.295412	0.161205
AT3G21660	N/A	-0.0347959	0.9999	-0.235851	0.999999	-0.222794	0.966711
AT3G28430	TT9	0.00351005	0.9999	0.0573606	0.999999	-0.265697	0.214197
AT3G49590	ATG13	-0.0988153	0.9999	0.0286939	0.999999	0.396727	0.00265101
AT3G50590	TWD40-1	0.0327955	0.9999	0.023383	0.999999	0.0838814	0.693171
AT3G53230	CDC48B	-0.180689	0.9999	-0.305618	0.3115	0.102559	0.804929
AT3G53930	ATG1B	0.379276	0.9999	0.444292	0.537353	0.556424	0.0681288
AT3G56440	ATG18D	0.235911	0.9999	0.0616961	0.999999	0.00620317	0.999982
AT3G57090	FIS1B	-0.19236	0.9999	-0.0949955	0.978086	0.142865	0.384056
AT3G58040	SINAT2	0.18179	0.9999	0.298406	0.565942	0.0926996	0.94459
AT3G59950	ATG4B	-0.0229449	0.9999	0.0538156	0.999999	0.0435019	0.999982
AT3G60640	ATG8G	-0.0781274	0.9999	-0.330994	0.282395	0.323755	0.096847
AT3G61710	ATG6	0.138522	0.9999	0.206021	0.631315	0.0702375	0.966344
AT3G61960	ATG1A	0.137543	0.9999	0.205541	0.436144	0.0138081	0.999982
AT3G62770	ATG18A	-0.0123633	0.9999	-0.164266	0.694563	0.282946	0.0709308
AT4G02030	MTV16	0.0784725	0.9999	0.414638	0.378714	0.168745	0.778908
AT4G04210	PUX4	-0.160298	0.9999	-0.316949	0.152912	-0.0516639	0.995596
AT4G04620	ATG8B	-0.366631	0.9999	-0.243646	0.45577	0.161891	0.466111
AT4G06676	N/A	NA	NA	NA	NA	NA	NA
AT4G08540	ATG14B	NA	NA	NA	NA	NA	NA
AT4G15410	PUX5	0.0580383	0.9999	-0.160617	0.598283	0.47142	0.000749776
AT4G16520	ATG8F	-0.16589	0.9999	0.0011151	0.999999	0.407427	0.00764141
AT4G21980	ATG8A	-0.0756145	0.9999	0.0437273	0.999999	0.326529	0.0124031
AT4G22150	PUX3	-0.0606296	0.9999	-0.0566628	0.999999	0.222013	0.106054
AT4G22330	CES1	-0.0241378	0.9999	0.102754	0.971308	0.200017	0.210762
AT4G24960	HVA22E	-0.142331	0.9999	-0.258643	0.655291	-0.491268	0.0155901
AT4G29380	MTV11	-0.0214866	0.9999	-0.196374	0.602855	0.223945	0.220656
AT4G30510	ATG18B	NA	NA	NA	NA	NA	NA
AT4G30790	ATG11	-0.083704	0.9999	0.256405	0.626649	0.0368288	0.999982
AT5G01770	RAPTOR1	0.108806	0.9999	0.148296	0.999999	-0.176647	0.929723
AT5G03340	CDC48C	-0.00262929	0.9999	-0.194732	0.625444	0.506203	0.00234844
AT5G05150	ATG18E	-0.177125	0.9999	-0.0864733	0.999999	-0.48484	0.347158
AT5G12390	FIS1B	-0.223393	0.9999	-0.182586	0.684083	0.375916	0.0237686
AT5G16280	TRS85	-0.114039	0.9999	-0.146547	0.978086	0.311316	0.191628
AT5G17290	ATG5	0.158558	0.9999	0.197401	0.729664	0.323211	0.0953804
AT5G24360	IRE1	-0.0727726	0.9999	-0.197044	0.662385	0.222642	0.310178
AT5G43560	MUSE14	0.00273015	0.9999	-0.136213	0.655291	-0.00190141	0.999982
AT5G43930	RTP5	0.100096	0.9999	0.278927	0.697587	0.448022	0.0998397
AT5G45900	ATG7	0.145538	0.9999	0.1287	0.960689	0.0431733	0.999982
AT5G49540	N/A	-0.107227	0.9999	-0.126697	0.65536	0.0741613	0.740255
AT5G50230	ATG16	-0.0975242	0.9999	-0.106393	0.940116	0.0995699	0.708701
AT5G61500	ATG3	0.0384915	0.9999	0.0429873	0.999999	0.0997411	0.84883
AT5G66930	ATG101	0.142324	0.9999	0.254343	0.593866	0.353634	0.0850905

## Sheet: Table S2
Table S2. List of predicted microautophagy-related genes and expression data used in heatmap geneartion
Differential gene expression analysis of microautophagy genes used in heatmap (Fig 7c).
Previously published (Woodson et al., 2015) microarray data from 4 day old seedlings prior to and during de-etiolation.
All values reflect differential expression of fc2 relative to wt within the same timepoint.
GeneID	Gene	t0_logFC	t0_FDR	t30_logFC	t30_FDR	t120_logFC	t120_FDR
At1g03950	VPS2.3	-0.0113579	0.9999	0.202156	0.999999	0.238015	0.693547
At1g07230	NPC1	-0.0193956	0.9999	-0.0209319	0.999999	0.303181	0.113792
At1g08190	VPS41	0.11775	0.9999	0.216504	0.659302	-0.0395016	0.999982
At1g12470	VPS18	0.00898907	0.9999	0.0287462	0.999999	0.273206	0.0606452
At1g17730	VPS46.1	-0.0177616	0.9999	0.128573	0.728031	-0.0470466	0.975966
At1g20110	FREE1	0.0165038	0.9999	0.0536696	0.999999	0.263894	0.0122386
At1g54210	ATG12A	-0.043074	0.9999	0.185808	0.950561	0.172601	0.666872
At1g60490	VPS34	0.0526904	0.9999	-0.028392	0.999999	0.0898103	0.77005
At1g73030	VPS46.2	-0.14299	0.9999	-0.0519417	0.999999	0.173511	0.326447
At1g77890	ATG14A	0.0667469	0.9999	-0.00716241	0.999999	0.261871	0.342317
At2g06530	VPS2.3	0.0484495	0.9999	0.0425495	0.999999	0.191358	0.297158
At2g19830	VPS32	0.0454923	0.9999	0.199775	0.788579	0.267871	0.241393
At2g27600	VPS4	0.120181	0.9999	0.190031	0.714698	0.178934	0.44733
At2g31260	ATG9	0.188256	0.9999	0.528451	0.324773	0.227908	0.569136
At2g36680	ModR	-0.124745	0.9999	0.206036	0.890567	0.327982	0.213511
At2g40810	ATG18C	-0.0573623	0.9999	0.121752	0.999999	0.0612599	0.999982
At2g45170	ATG8E	-0.292874	0.9999	-0.0812034	0.999999	0.478222	0.00207876
At3g06420	ATG8H	-0.209475	0.9999	-0.138865	0.999999	0.464336	0.018188
AT3G07525	ATG10	NA	NA	NA	NA	NA	NA
At3g08530	CHC2	0.0543131	0.9999	-0.0370239	0.999999	0.0353858	0.999982
At3g09560	PAH1	0.0811903	0.9999	0.203589	0.945651	-0.0754368	0.999982
AT3G11130	CHC1	NA	NA	NA	NA	NA	NA
At3g12400	ELC	-0.095165	0.9999	-0.0514214	0.999999	0.192971	0.307433
At3g15580	ATG8I	-0.197292	0.9999	-0.0902073	0.960264	0.439293	0.000469318
At3g18770	ATG13B	-0.0770391	0.9999	-0.177061	0.999999	-0.189353	0.890857
At3g19190	ATG2	0.187708	0.9999	0.116705	0.999999	0.295412	0.161205
At3g45000	VPS24.2	0.058446	0.9999	0.00911987	0.999999	-0.0448896	0.999982
At3g49590	ATG13	-0.0988153	0.9999	0.0286939	0.999999	0.396727	0.00265101
AT3G53120	VPS28-2	NA	NA	NA	NA	NA	NA
At3g53930	ATG1B	0.379276	0.9999	0.444292	0.537353	0.556424	0.0681288
At3g54860	VPS33	0.116343	0.9999	-0.0938582	0.999999	0.290537	0.0934241
At3g56440	ATG18D	0.235911	0.9999	0.0616961	0.999999	0.00620317	0.999982
At3g59950	ATG4B	-0.0229449	0.9999	0.0538156	0.999999	0.0435019	0.999982
At3g60640	ATG8G	-0.0781274	0.9999	-0.330994	0.282395	0.323755	0.096847
At3g61710	ATG6	0.138522	0.9999	0.206021	0.631315	0.0702375	0.966344
At3g61960	ATG1A	0.137543	0.9999	0.205541	0.436144	0.0138081	0.999982
At3g62080	CHMP7	0.10622	0.9999	0.389936	0.534801	0.513098	0.119068
At3g62770	ATG18A	-0.0123633	0.9999	-0.164266	0.694563	0.282946	0.0709308
At4g04620	ATG8B	-0.366631	0.9999	-0.243646	0.45577	0.161891	0.466111
At4g05000	VPS28-2	-0.141856	0.9999	-0.117378	0.914107	0.267084	0.0794419
At4g16520	ATG8F	-0.16589	0.9999	0.0011151	0.999999	0.407427	0.00764141
AT4G19003	VPS25	NA	NA	NA	NA	NA	NA
At4g21560	VPS28-1	-0.0500777	0.9999	0.0209188	0.999999	0.0494932	0.999982
At4g21980	ATG8A	-0.0756145	0.9999	0.0437273	0.999999	0.326529	0.0124031
At4g24690	NBR1	-0.0571038	0.9999	-0.136401	0.66136	0.172555	0.181964
At4g27040	VPS22	-0.111887	0.9999	-0.050726	0.999999	-0.0111551	0.999982
At4g29160	SNF7.1	-0.0418542	0.9999	0.00116156	0.999999	0.254762	0.227035
At4g29380	VPS15	-0.0214866	0.9999	-0.196374	0.602855	0.223945	0.220656
At4g30790	ATG11	-0.083704	0.9999	0.256405	0.626649	0.0368288	0.999982
At4g36630	VPS39	0.0051537	0.9999	0.240529	0.776077	0.230258	0.482181
At5g02500	HSC70	0.132617	0.9999	-0.0565816	0.999999	0.0382121	0.944882
At5g04920	VPS36	0.0221063	0.9999	0.130707	0.887613	-0.0549554	0.9916
At5g05150	ATG18E	-0.177125	0.9999	-0.0864733	0.999999	-0.48484	0.347158
AT5G09260	VPS20.2	NA	NA	NA	NA	NA	NA
AT5G13860	VSP23B	NA	NA	NA	NA	NA	NA
At5g17290	ATG5	0.158558	0.9999	0.197401	0.729664	0.323211	0.0953804
At5g22950	VPS24.1	-0.0225453	0.9999	0.262073	0.927193	0.0459014	0.999982
At5g42870	PAH2	0.260387	0.9999	0.36502	0.581876	0.530965	0.067503
At5g44560	VPS2.2	0.04031	0.9999	0.0980409	0.999999	0.168039	0.833949
At5g45900	ATG7	0.145538	0.9999	0.1287	0.960689	0.0431733	0.999982
At5g46860	VAM3	0.00269449	0.9999	0.0420765	0.999999	0.366949	0.00560979
At5g50230	ATG16	-0.0975242	0.9999	-0.106393	0.940116	0.0995699	0.708701
At5g53330	Ub-EF1B	-0.0927461	0.9999	0.189203	0.730033	0.299126	0.0895753
At5g61500	ATG3	0.0384915	0.9999	0.0429873	0.999999	0.0997411	0.84883
At5g63880	VPS20.1	-0.016097	0.9999	0.0536933	0.999999	0.330632	0.16139
At5g66930	ATG101	0.142324	0.9999	0.254343	0.593866	0.353634	0.0850905
